# Supplementary material for: Expression profiling of familial breast cancers demonstrates higher expression of FGFR2 in BRCA2-associated tumors
Source: Springer Nature journal article supplement (doi:10.1007/s10549-008-0087-1), 2008-06-17
Supplement: MOESM1 [file 8840108]

Supplementary Table 1

| UHNid           | Unigene ID | Name                 | Cytoband    | BRCA1 (n=7) | BRCA2 (n=6) | BRCA1  | BRCA2  | Fold difference | Rank | t-statistic | *p-value |
|-----------------|------------|----------------------|-------------|-------------|-------------|--------|--------|-----------------|------|-------------|----------|
| UHNhcdna0000191 | Hs.209983  | Stathmin 1           | 1p36.1-p35  | 7           | 6           | 0.6033 | 0.1714 | 3.5202          | 1    | 3.2509      | 0.0002   |
| UHNhcdna0000466 | Hs.585378  | RAB GTPase           | 1q24        | 7           | 6           | 0.6712 | 1.6021 | 0.4189          | 2    | -2.9525     | 0.0004   |
| UHNhcdna0000701 |            |                      |             | 6           | 4           | 0.9192 | 6.8947 | 0.1333          | 3    | -2.8711     | 0.0005   |
| UHNhcdna0012996 | Hs.534404  | Ribosomal p          | Xq28        | 7           | 6           | 0.7783 | 0.2591 | 3.0032          | 4    | 2.7182      | 0.0007   |
| UHNhcdna0001321 | Hs.198612  | Gamma-amino          | q22.1-q22.3 | 7           | 6           | 0.6519 | 1.7464 | 0.3733          | 5    | -2.5522     | 0.0012   |
| UHNhcdna0001291 | Hs.430733  | Chloride channel     | 11q13.5-q14 | 5           | 5           | 0.5800 | 1.7874 | 0.3245          | 6    | -2.5308     | 0.0012   |
| UHNhcdna0000078 | Hs.371914  | Bleomycin B          | 17q11.2     | 7           | 6           | 0.8894 | 1.8763 | 0.4740          | 7    | -2.5215     | 0.0013   |
| UHNhcdna0016756 | Hs.473583  | Y box binding        | 1p34        | 7           | 6           | 0.5839 | 0.2344 | 2.4912          | 8    | 2.5074      | 0.0013   |
| UHNhcdna0003487 | Hs.443891  | Cache domain         | 1p31.3      | 6           | 6           | 0.5843 | 1.2182 | 0.4797          | 9    | -2.4819     | 0.0014   |
| UHNhcdna0008483 | Hs.313     | Secreted phospho     | 4q21-q25    | 7           | 6           | 0.8417 | 0.2238 | 3.7607          | 10   | 2.3928      | 0.0019   |
| UHNhcdna0000315 |            |                      |             | 7           | 6           | 0.7802 | 1.6879 | 0.4622          | 11   | -2.3821     | 0.0019   |
| UHNhcdna0004543 | Hs.188630  | Lipase, hepatic      | 15q21-q23   | 7           | 6           | 7.7768 | 2.0242 | 3.8420          | 12   | 2.3742      | 0.0020   |
| UHNhcdna0001327 | Hs.503743  | Glutamate receptor   | 11q22       | 7           | 6           | 0.5462 | 1.5169 | 0.3600          | 13   | -2.3646     | 0.0020   |
| UHNhcdna0011841 | Hs.101949  | Kelch repeat         | 11q22.3     | 7           | 6           | 1.4348 | 0.7653 | 1.8748          | 14   | 2.3515      | 0.0021   |
| UHNhcdna0000909 | Hs.389734  | Transcription factor | Xq22.1      | 7           | 5           | 0.5328 | 1.7957 | 0.2967          | 15   | -2.3484     | 0.0021   |
| UHNhcdna0000828 | Hs.521432  | Leucine zipper       | 8p22        | 7           | 5           | 0.5320 | 1.3942 | 0.3816          | 16   | -2.3466     | 0.0021   |
| UHNhcdna0006516 | Hs.511149  | Synaptosomal         | 15q15.1     | 5           | 4           | 0.9222 | 2.8142 | 0.3277          | 17   | -2.3380     | 0.0022   |
| UHNhcdna0005471 | Hs.434937  | Peptidylprolyl       | 15q21-q22   | 7           | 6           | 0.8533 | 0.4077 | 2.0928          | 18   | 2.3274      | 0.0023   |
| UHNhcdna0000434 | Hs.75149   | SH3-domain           | 9p22        | 7           | 6           | 0.5780 | 1.4721 | 0.3926          | 19   | -2.3239     | 0.0023   |
| UHNhcdna0001879 | Hs.269782  | Guanine nucleotide   | 9q21        | 7           | 6           | 0.5495 | 1.3835 | 0.3972          | 20   | -2.3108     | 0.0024   |
| UHNhcdna0018494 | Hs.493516  | PC4 and SF           | 9p22.3      | 6           | 5           | 1.0833 | 0.3671 | 2.9506          | 21   | 2.2785      | 0.0027   |
| UHNhcdna0000295 | Hs.567162  | Clone 24425 mRNA seq |             | 7           | 6           | 0.7489 | 2.5367 | 0.2952          | 22   | -2.2746     | 0.0027   |
| UHNhcdna0015954 | Hs.172550  | Polypyrimidine       | 19p13.3     | 7           | 5           | 0.7932 | 0.4373 | 1.8140          | 23   | 2.2644      | 0.0028   |
| UHNhcdna0002681 | Hs.533956  | ATPase, Ca           | Xq28        | 7           | 6           | 0.7287 | 1.6808 | 0.4335          | 24   | -2.2626     | 0.0028   |
| UHNhcdna0001208 | Hs.22973   | CDNA FLJ13878        | 13q13.3     | 7           | 6           | 0.8546 | 1.8616 | 0.4591          | 25   | -2.2579     | 0.0028   |
| UHNhcdna0017613 | Hs.591314  | Guanine methyl       | 3q24        | 7           | 6           | 0.9470 | 0.5564 | 1.7022          | 26   | 2.2524      | 0.0029   |
| UHNhcdna0000034 | Hs.12751   | G protein-coupled    | 10q26.2     | 7           | 6           | 0.6715 | 1.7448 | 0.3849          | 27   | -2.2507     | 0.0029   |

|                 |           |                    |             |   |   |        |        |        |    |         |        |
|-----------------|-----------|--------------------|-------------|---|---|--------|--------|--------|----|---------|--------|
| UHNhcdna0017772 | Hs.546289 | Ribosomal r        | 6q23.2      | 7 | 5 | 0.9568 | 0.4196 | 2.2805 | 28 | 2.2263  | 0.0031 |
| UHNhcdna0002997 | Hs.483635 | Fibroblast g       | 5q31        | 7 | 4 | 0.7004 | 2.2237 | 0.3150 | 29 | -2.2256 | 0.0032 |
| UHNhcdna0001222 | Hs.459842 | Ataxin 2-bin       | 16p13.3     | 6 | 5 | 0.6175 | 1.8992 | 0.3251 | 30 | -2.2250 | 0.0032 |
| UHNhcdna0005168 | Hs.534255 | Beta-2-micr        | 15q21-q22.2 | 7 | 6 | 2.1342 | 0.9501 | 2.2462 | 31 | 2.2202  | 0.0032 |
| UHNhcdna0000609 |           |                    |             | 7 | 6 | 0.7774 | 2.3350 | 0.3329 | 32 | -2.2066 | 0.0034 |
| UHNhcdna0004771 | Hs.363087 | Hypothetica        | 4q12        | 1 | 4 | 0.5111 | 7.6976 | 0.0664 | 33 | -2.2062 | 0.0034 |
| UHNhcdna0001587 | Hs.438823 | Potassium v        | 7q35-q36    | 7 | 6 | 0.5845 | 1.1179 | 0.5229 | 34 | -2.1890 | 0.0036 |
| UHNhcdna0001702 | Hs.25845  | Hypothetica        | 5p12        | 7 | 6 | 0.6406 | 1.3619 | 0.4704 | 35 | -2.1800 | 0.0037 |
| UHNhcdna0002797 | Hs.585960 | CDNA FLJ43061      | fis, clo    | 6 | 5 | 0.7913 | 2.0016 | 0.3953 | 36 | -2.1712 | 0.0038 |
| UHNhcdna0000762 |           |                    |             | 7 | 6 | 0.5914 | 1.0222 | 0.5785 | 37 | -2.1558 | 0.0040 |
| UHNhcdna0012994 | Hs.534404 | Ribosomal r        | Xq28        | 7 | 6 | 0.6253 | 0.2382 | 2.6249 | 38 | 2.1535  | 0.0040 |
| UHNhcdna0000396 | Hs.435556 | Bifunctional       | 16p13.12    | 7 | 6 | 0.5229 | 1.0297 | 0.5079 | 39 | -2.1461 | 0.0041 |
| UHNhcdna0000464 | Hs.533683 | Fibroblast g       | 10q26       | 7 | 6 | 0.5897 | 1.3386 | 0.4405 | 40 | -2.1297 | 0.0043 |
| UHNhcdna0002814 | Hs.517557 | Zinc finger r      | 22q12.2     | 7 | 5 | 0.8269 | 2.2393 | 0.3693 | 41 | -2.1253 | 0.0044 |
| UHNhcdna0012898 | Hs.534404 | Ribosomal r        | Xq28        | 7 | 6 | 0.5029 | 0.1708 | 2.9445 | 42 | 2.1252  | 0.0044 |
| UHNhcdna0003008 | Hs.90866  | Clone 23961        | mRNA seq    | 6 | 4 | 0.8758 | 4.5217 | 0.1937 | 43 | -2.1237 | 0.0044 |
| UHNhcdna0016549 | Hs.58324  | ADAM meta          | 21q21.3     | 7 | 6 | 1.9783 | 0.9008 | 2.1961 | 44 | 2.1121  | 0.0046 |
| UHNhcdna0015773 | Hs.238964 | Hypothetica        | 2q36.1      | 7 | 6 | 0.9683 | 0.5658 | 1.7115 | 45 | 2.1098  | 0.0046 |
| UHNhcdna0007104 | Hs.469881 | LIM and ser        | 2q14.3      | 7 | 6 | 1.5887 | 0.4609 | 3.4472 | 46 | 2.1087  | 0.0046 |
| UHNhcdna0000427 | Hs.485489 | Chloride intr      | 6p12.1-21.1 | 7 | 5 | 0.6663 | 2.9306 | 0.2274 | 47 | -2.0972 | 0.0048 |
| UHNhcdna0012946 | Hs.291235 | Transcribed locus, | weak        | 7 | 6 | 1.0448 | 0.4608 | 2.2673 | 48 | 2.0870  | 0.0050 |
| UHNhcdna0012900 | Hs.534404 | Ribosomal r        | Xq28        | 7 | 6 | 0.5234 | 0.2074 | 2.5239 | 49 | 2.0822  | 0.0051 |
| UHNhcdna0001564 | Hs.587442 | CDNA FLJ37386      | fis, clo    | 7 | 6 | 0.6937 | 1.4714 | 0.4714 | 50 | -2.0815 | 0.0051 |
| UHNhcdna0001929 | Hs.567530 | Transmemb          | 7q33        | 6 | 6 | 0.8443 | 2.0732 | 0.4073 | 51 | -2.0807 | 0.0051 |
| UHNhcdna0002474 |           |                    |             | 6 | 4 | 0.6789 | 1.6627 | 0.4083 | 52 | -2.0767 | 0.0052 |
| UHNhcdna0002902 | Hs.643456 | Galactokina        | 15q21.1     | 6 | 2 | 0.6577 | 1.8737 | 0.3510 | 53 | -2.0746 | 0.0052 |
| UHNhcdna0007056 | Hs.411501 | Keratin 7          | 12q12-q13   | 7 | 6 | 0.5190 | 0.1333 | 3.8941 | 54 | 2.0725  | 0.0052 |
| UHNhcdna0008416 | Hs.546286 | Ribosomal r        | 1q13.3-q13. | 7 | 6 | 0.2457 | 0.0699 | 3.5139 | 55 | 2.0720  | 0.0052 |
| UHNhcdna0002990 | Hs.567895 | Family with        | 3p14.1      | 7 | 6 | 0.7564 | 1.5524 | 0.4872 | 56 | -2.0690 | 0.0053 |
| UHNhcdna0000592 | Hs.592827 | CDNA FLJ35956      | fis, clo    | 6 | 3 | 0.8163 | 3.0351 | 0.2689 | 57 | -2.0650 | 0.0054 |
| UHNhcdna0008626 | Hs.137427 | Interferon re      | 16q24.1     | 7 | 6 | 5.7655 | 2.0812 | 2.7703 | 58 | 2.0607  | 0.0054 |
| UHNhcdna0000022 | Hs.497873 | WD repeat          | 1q42.11     | 7 | 6 | 1.1153 | 2.4640 | 0.4526 | 59 | -2.0538 | 0.0056 |

|                 |           |                          |             |   |   |        |         |        |    |         |        |
|-----------------|-----------|--------------------------|-------------|---|---|--------|---------|--------|----|---------|--------|
| UHNhcdna0000696 | Hs.420244 | Family with              | 1p34.2      | 7 | 6 | 0.7678 | 1.3754  | 0.5582 | 60 | -2.0532 | 0.0056 |
| UHNhcdna0003288 |           |                          |             | 7 | 6 | 1.0577 | 2.1838  | 0.4843 | 61 | -2.0524 | 0.0056 |
| UHNhcdna0004160 | Hs.130462 | Similar to 6C            | 18q12.2     | 6 | 5 | 0.5570 | 0.9845  | 0.5658 | 62 | -2.0508 | 0.0056 |
| UHNhcdna0005870 | Hs.92147  | Transcribed locus        |             | 7 | 6 | 8.1085 | 1.9558  | 4.1458 | 63 | 2.0443  | 0.0057 |
| UHNhcdna0003407 | Hs.98445  | RAS p21 pr               | 3q22-q23    | 7 | 6 | 0.8239 | 1.3750  | 0.5992 | 64 | -2.0427 | 0.0058 |
| UHNhcdna0001809 | Hs.528833 | Fatso                    | 16q12.2     | 7 | 6 | 0.4746 | 0.9189  | 0.5165 | 65 | -2.0337 | 0.0060 |
| UHNhcdna0004086 | Hs.132858 | RAP1, GTP                | 4q23-q25    | 7 | 6 | 1.0258 | 0.3788  | 2.7084 | 66 | 2.0337  | 0.0060 |
| UHNhcdna0001470 | Hs.168241 | Chromosom                | 14q32.2     | 7 | 6 | 0.8890 | 1.9385  | 0.4586 | 67 | -2.0306 | 0.0060 |
| UHNhcdna0011337 | Hs.76686  | Glutathione              | 3p21.3      | 7 | 6 | 2.8035 | 1.1504  | 2.4369 | 68 | 2.0214  | 0.0062 |
| UHNhcdna0007816 |           |                          |             | 7 | 6 | 0.8098 | 0.3403  | 2.3798 | 69 | 2.0190  | 0.0063 |
| UHNhcdna0002790 | Hs.520414 | Interferon g             | 6q23-q24    | 7 | 5 | 1.2321 | 4.3493  | 0.2833 | 70 | -2.0172 | 0.0063 |
| UHNhcdna0002946 | Hs.141120 | Kruppel-like             | Xp11.21     | 7 | 3 | 0.7266 | 5.7028  | 0.1274 | 71 | -2.0137 | 0.0064 |
| UHNhcdna0014381 | Hs.544577 | Glyceraldeh              | 12p13       | 7 | 6 | 0.2348 | 0.0954  | 2.4611 | 72 | 2.0069  | 0.0065 |
| UHNhcdna0005223 | Hs.1004   | Bromodomai               | 3p26-p25    | 3 | 5 | 1.2726 | 10.2006 | 0.1248 | 73 | -1.9983 | 0.0067 |
| UHNhcdna0005626 | Hs.235390 | Zinc finger p            | 19q13.43    | 5 | 4 | 1.6163 | 0.4853  | 3.3306 | 74 | 1.9977  | 0.0067 |
| UHNhcdna0000036 | Hs.9728   | Armadillo re             | q21.33-q22. | 7 | 6 | 0.6433 | 1.2078  | 0.5326 | 75 | -1.9967 | 0.0067 |
| UHNhcdna0002548 | Hs.335933 | Hypothetica              | 7p11.2      | 6 | 5 | 0.5543 | 2.2657  | 0.2447 | 76 | -1.9962 | 0.0067 |
| UHNhcdna0002146 | Hs.30567  | Homo sapiens, clone IM   |             | 7 | 6 | 1.2316 | 3.1202  | 0.3947 | 77 | -1.9928 | 0.0068 |
| UHNhcdna0011495 | Hs.429    | ATP synthase             | 2q31.1      | 7 | 6 | 0.6844 | 0.3181  | 2.1515 | 78 | 1.9924  | 0.0068 |
| UHNhcdna0000488 | Hs.529044 | RAB22A, m                | 20q13.32    | 5 | 5 | 0.5327 | 2.3910  | 0.2228 | 79 | -1.9913 | 0.0068 |
| UHNhcdna0014095 | Hs.292063 | Eukaryotic t             | 12q13.13    | 7 | 6 | 1.3036 | 0.7407  | 1.7599 | 80 | 1.9876  | 0.0069 |
| UHNhcdna0005282 | Hs.282901 | RNA-binding              | 20q11.22    | 7 | 6 | 4.2895 | 1.4980  | 2.8635 | 81 | 1.9830  | 0.0070 |
| UHNhcdna0000514 | Hs.167368 | Catenin (cat)            | 2p12-p11.1  | 6 | 5 | 0.5964 | 1.6455  | 0.3624 | 82 | -1.9795 | 0.0071 |
| UHNhcdna0000313 | Hs.588815 | High-mobilit             | 22q13.1     | 7 | 6 | 0.6190 | 1.4535  | 0.4259 | 83 | -1.9774 | 0.0072 |
| UHNhcdna0010649 | Hs.268869 | Alcohol dehyd            | 8q13.1      | 6 | 2 | 0.5765 | 2.5892  | 0.2227 | 84 | -1.9744 | 0.0072 |
| UHNhcdna0002532 | Hs.91389  | Homo sapiens, Similar to |             | 7 | 6 | 0.7330 | 1.4313  | 0.5121 | 85 | -1.9586 | 0.0076 |
| UHNhcdna0014145 | Hs.355934 | Splicing factor          | 1p34.3      | 7 | 6 | 1.1397 | 0.5659  | 2.0137 | 86 | 1.9525  | 0.0078 |
| UHNhcdna0000299 | Hs.516830 | Sulfiredoxin             | 20p13       | 7 | 6 | 0.8284 | 1.8523  | 0.4472 | 87 | -1.9516 | 0.0078 |
| UHNhcdna0000309 | Hs.369095 | Carbonic anhydrase       | Xp21.1      | 7 | 5 | 0.7751 | 1.7609  | 0.4402 | 88 | -1.9510 | 0.0078 |
| UHNhcdna0002746 | Hs.594214 | KIAA0644 gene            | 7p15.1      | 7 | 6 | 0.6952 | 1.2873  | 0.5401 | 89 | -1.9467 | 0.0079 |
| UHNhcdna0004315 | Hs.440960 | RAD23 homolog            | 19p13.2     | 7 | 6 | 5.8397 | 2.3898  | 2.4436 | 90 | 1.9436  | 0.0080 |
| UHNhcdna0007270 | Hs.461819 | Vacuolar protein         | 17p13.3     | 6 | 5 | 2.7747 | 0.4389  | 6.3220 | 91 | 1.9411  | 0.0081 |

|                 |           |                         |                |   |        |        |        |        |         |         |        |
|-----------------|-----------|-------------------------|----------------|---|--------|--------|--------|--------|---------|---------|--------|
| UHNhcdna0002727 |           |                         | 7              | 6 | 0.5818 | 1.0483 | 0.5550 | 92     | -1.9407 | 0.0081  |        |
| UHNhcdna0016646 | Hs.433670 | Ferritin, ligh          | 9q13.3-q13.    | 7 | 6      | 0.7255 | 0.2669 | 2.7184 | 93      | 1.9367  | 0.0082 |
| UHNhcdna0002338 | Hs.13261  | Brain-specif            | 6q12           | 7 | 6      | 0.8977 | 1.5168 | 0.5918 | 94      | -1.9342 | 0.0083 |
| UHNhcdna0002715 | Hs.479439 | CDNA clone              | IMAGE:48C      | 7 | 6      | 1.0989 | 2.0990 | 0.5235 | 95      | -1.9328 | 0.0083 |
| UHNhcdna0001685 |           |                         |                | 7 | 6      | 0.6689 | 1.3590 | 0.4922 | 96      | -1.9291 | 0.0084 |
| UHNhcdna0007147 | Hs.585011 | Chromosorr              | 1q42.13        | 1 | 5      | 1.0201 | 5.3187 | 0.1918 | 97      | -1.9279 | 0.0084 |
| UHNhcdna0003348 | Hs.554217 | Clone                   | IMAGE:110349 m | 7 | 6      | 0.7729 | 1.3238 | 0.5839 | 98      | -1.9247 | 0.0085 |
| UHNhcdna0016722 | Hs.444749 | Ribosomal r             | 14q21          | 7 | 6      | 0.9028 | 0.2981 | 3.0289 | 99      | 1.9229  | 0.0086 |
| UHNhcdna0001340 | Hs.302772 | SH3 domair              | 6q13-15        | 6 | 4      | 0.7583 | 1.8372 | 0.4127 | 100     | -1.9223 | 0.0086 |
| UHNhcdna0014191 | Hs.233458 | Nuclear trar            | 1p32 1p32      | 7 | 6      | 1.0255 | 0.5304 | 1.9334 | 101     | 1.9215  | 0.0086 |
| UHNhcdna0018819 | Hs.535724 | Zic family m            | 3q24           | 7 | 6      | 3.4130 | 1.3227 | 2.5803 | 102     | 1.9212  | 0.0086 |
| UHNhcdna0007822 | Hs.511743 | Tubulin, bet            | 16q24.3        | 7 | 4      | 0.7922 | 0.1892 | 4.1871 | 103     | 1.9178  | 0.0087 |
| UHNhcdna0001231 | Hs.436550 | Hypothetica             | 12q13.13       | 7 | 6      | 0.7877 | 1.8670 | 0.4219 | 104     | -1.9158 | 0.0088 |
| UHNhcdna0004059 | Hs.503429 | CDNA clone              | IMAGE:527      | 7 | 6      | 0.5957 | 0.2384 | 2.4982 | 105     | 1.9144  | 0.0088 |
| UHNhcdna0003055 | Hs.271903 | Amyotrophic             | 2q33.3         | 7 | 5      | 0.8485 | 2.2047 | 0.3849 | 106     | -1.9142 | 0.0088 |
| UHNhcdna0001333 | Hs.591838 | Paraneopla:             | 8p21.2         | 6 | 6      | 0.6559 | 1.3376 | 0.4904 | 107     | -1.9125 | 0.0089 |
| UHNhcdna0000777 | Hs.255874 | Chromosorr              | 14q11.2        | 7 | 6      | 0.5301 | 1.1608 | 0.4566 | 108     | -1.9124 | 0.0089 |
| UHNhcdna0001568 | Hs.116233 | BTB (POZ)               | 6p21           | 7 | 6      | 0.5537 | 1.1732 | 0.4720 | 109     | -1.9115 | 0.0089 |
| UHNhcdna0001227 | Hs.45719  | Protein pho:            | 20q11.23       | 7 | 6      | 0.7742 | 1.3206 | 0.5863 | 110     | -1.9103 | 0.0089 |
| UHNhcdna0003558 | Hs.581787 | Hypothetica             | 4q27           | 7 | 5      | 0.7815 | 2.3302 | 0.3354 | 111     | -1.9091 | 0.0090 |
| UHNhcdna0001371 | Hs.592817 | Cri-du-chat region mRN  |                | 7 | 6      | 0.5111 | 1.1783 | 0.4337 | 112     | -1.9037 | 0.0091 |
| UHNhcdna0001681 | Hs.521615 | Chromosorr              | 8q13.1         | 7 | 6      | 0.5312 | 0.9896 | 0.5368 | 113     | -1.9033 | 0.0091 |
| UHNhcdna0001183 | Hs.112143 | F-box and k             | 5q21.3         | 6 | 5      | 0.6683 | 1.7349 | 0.3852 | 114     | -1.9010 | 0.0092 |
| UHNhcdna0000011 | Hs.268726 | SH3 and m               | 11q13.3        | 7 | 5      | 0.7143 | 1.4590 | 0.4896 | 115     | -1.9010 | 0.0092 |
| UHNhcdna0001476 | Hs.524513 | Hydroxyster             | 12q13          | 7 | 4      | 0.8332 | 1.6900 | 0.4930 | 116     | -1.8964 | 0.0094 |
| UHNhcdna0001352 | Hs.437277 | Sequestoso              | 5q35           | 7 | 6      | 0.5387 | 1.1303 | 0.4766 | 117     | -1.8963 | 0.0094 |
| UHNhcdna0016914 | Hs.567276 | Glypican 3              | Xq26.1         | 7 | 6      | 0.9374 | 0.5099 | 1.8384 | 118     | 1.8949  | 0.0094 |
| UHNhcdna0002781 | Hs.556230 | Kin of IRRE             | 11q24          | 5 | 4      | 0.9286 | 1.7178 | 0.5406 | 119     | -1.8930 | 0.0095 |
| UHNhcdna0007584 | Hs.80714  | Transcribed locus, weak |                | 7 | 6      | 4.1693 | 1.3806 | 3.0198 | 120     | 1.8891  | 0.0096 |
| UHNhcdna0001585 | Hs.532835 | Chromosorr              | 18q22.3        | 7 | 6      | 0.6909 | 1.2837 | 0.5382 | 121     | -1.8890 | 0.0096 |
| UHNhcdna0000407 | Hs.561815 | Staufen, RN             | 8q13-q21.1     | 7 | 5      | 0.8710 | 2.3959 | 0.3635 | 122     | -1.8865 | 0.0097 |
| UHNhcdna0018938 | Hs.57813  | Zinc ribbon             | 6p21.3         | 7 | 5      | 2.3023 | 0.6597 | 3.4901 | 123     | 1.8829  | 0.0098 |

|                 |           |                    |            |   |   |        |        |        |     |         |        |
|-----------------|-----------|--------------------|------------|---|---|--------|--------|--------|-----|---------|--------|
| UHNhcdna0001193 | Hs.517868 | Leucine rich       | 3p24       | 6 | 3 | 0.7933 | 3.6484 | 0.2174 | 124 | -1.8807 | 0.0098 |
| UHNhcdna0000463 | Hs.368282 | KIAA0564 p         | 13q14.11   | 7 | 6 | 0.7892 | 1.9074 | 0.4137 | 125 | -1.8792 | 0.0099 |
| UHNhcdna0005148 | Hs.633129 | CDNA FLJ33255      | fis, clo   | 7 | 6 | 0.6969 | 0.2689 | 2.5917 | 126 | 1.8783  | 0.0099 |
| UHNhcdna0004202 | Hs.471130 | Amyotrophic        | 2q33.1     | 7 | 6 | 0.6602 | 1.2253 | 0.5388 | 127 | -1.8766 | 0.0100 |
| UHNhcdna0009376 | Hs.535319 | HCF-binding        | 11q14      | 7 | 6 | 0.9375 | 0.4527 | 2.0709 | 128 | 1.8744  | 0.0101 |
| UHNhcdna0002748 | Hs.412836 | Leucine rich       | 1p22.2     | 7 | 6 | 0.9795 | 2.0542 | 0.4768 | 129 | -1.8724 | 0.0101 |
| UHNhcdna0001444 | Hs.368322 | Cadherin 8,        | 16q22.1    | 7 | 6 | 0.9360 | 1.8244 | 0.5131 | 130 | -1.8678 | 0.0103 |
| UHNhcdna0007973 | Hs.492740 | Activating tr      | 1q22-q23   | 3 | 5 | 0.8347 | 3.2183 | 0.2594 | 131 | -1.8670 | 0.0103 |
| UHNhcdna0002993 | Hs.187866 | Neuroplastir       | 15q22      | 4 | 3 | 0.8198 | 6.0308 | 0.1359 | 132 | -1.8658 | 0.0103 |
| UHNhcdna0001605 | Hs.416139 | CDNA FLJ37441      | fis, clo   | 7 | 5 | 0.7847 | 2.2899 | 0.3427 | 133 | -1.8623 | 0.0105 |
| UHNhcdna0003423 | Hs.147492 | Paternally e       | 7q21       | 7 | 5 | 0.6885 | 1.3374 | 0.5148 | 134 | -1.8610 | 0.0105 |
| UHNhcdna0013042 | Hs.209983 | Stathmin 1/        | 1p36.1-p35 | 7 | 6 | 0.8708 | 0.4817 | 1.8077 | 135 | 1.8601  | 0.0105 |
| UHNhcdna0018802 | Hs.29464  | Ethanolamir        | 12p12.1    | 4 | 4 | 1.0252 | 0.7003 | 1.4639 | 136 | 1.8587  | 0.0106 |
| UHNhcdna0000816 | Hs.91662  | KIAA0888 p         | 5q13.3     | 6 | 3 | 0.6886 | 1.9011 | 0.3622 | 137 | -1.8524 | 0.0108 |
| UHNhcdna0001200 | Hs.632686 | Chromosom          | 9q22.32    | 7 | 4 | 1.0421 | 2.4016 | 0.4339 | 138 | -1.8522 | 0.0108 |
| UHNhcdna0007315 |           |                    |            | 4 | 5 | 1.5874 | 0.6738 | 2.3560 | 139 | 1.8439  | 0.0111 |
| UHNhcdna0004980 | Hs.163424 | NOL1/NOP2          | 1p34       | 7 | 5 | 1.2159 | 0.5012 | 2.4259 | 140 | 1.8437  | 0.0111 |
| UHNhcdna0004083 | Hs.434890 | Hect domain        | 15q13      | 3 | 5 | 1.9685 | 5.3981 | 0.3647 | 141 | -1.8435 | 0.0111 |
| UHNhcdna0003241 |           |                    |            | 7 | 6 | 0.8277 | 1.4147 | 0.5850 | 142 | -1.8423 | 0.0112 |
| UHNhcdna0000679 | Hs.334603 | RALBP1 associated  | Eps        | 7 | 6 | 0.7117 | 1.6255 | 0.4378 | 143 | -1.8418 | 0.0112 |
| UHNhcdna0004514 | Hs.506784 | Lymphocyte         | 12q24      | 7 | 5 | 3.6486 | 1.3122 | 2.7806 | 144 | 1.8396  | 0.0113 |
| UHNhcdna0013880 | Hs.498160 | G protein-cc       | 1q42-q43   | 7 | 6 | 1.5437 | 0.9650 | 1.5997 | 145 | 1.8395  | 0.0113 |
| UHNhcdna0000803 | Hs.256667 | Pyruvate de        | 17q21.33   | 7 | 6 | 0.6060 | 1.1725 | 0.5168 | 146 | -1.8390 | 0.0113 |
| UHNhcdna0013946 | Hs.133379 | Transformin        | 1q41       | 7 | 6 | 1.6903 | 0.9518 | 1.7759 | 147 | 1.8373  | 0.0114 |
| UHNhcdna0000931 | Hs.444181 | Transcribed locus, | stron      | 7 | 5 | 0.7530 | 2.1513 | 0.3500 | 148 | -1.8365 | 0.0114 |
| UHNhcdna0004775 |           |                    |            | 4 | 5 | 1.3749 | 6.8338 | 0.2012 | 149 | -1.8359 | 0.0114 |
| UHNhcdna0001839 | Hs.591992 | Tripartite m       | 11p15.5    | 7 | 6 | 0.9102 | 1.6061 | 0.5667 | 150 | -1.8317 | 0.0116 |

\*; unadjusted p values are given
